# Supplementary material for: Biomimetic peptide enriched nonwoven scaffolds promote calcium phosphate mineralisation
Source: Royal Society of Chemistry journal article supplement (doi:10.1039/d0ra02446e), 2020-01-01
Supplement: d0ra02446e1.pdf [file d0ra02446e1.pdf]

## Supplementary information

SI Table 1. Reagents for preparation of SBF in the required order of dissolution.

| Order | Reagent                                                                                          | Amount  | Purity (%) | Formula weight (g/mol) |
|-------|--------------------------------------------------------------------------------------------------|---------|------------|------------------------|
| 1     | Sodium chloride (NaCl)                                                                           | 8.03    | 99.5       | 58.44                  |
| 2     | Sodium hydrogen carbonate (NaHCO <sub>3</sub> )                                                  | 0.35    | 99.5       | 84.00                  |
| 3     | Potassium chloride (KCl)                                                                         | 0.25    | 99.5       | 74.55                  |
| 4     | Di-potassium hydrogen phosphate trihydrate (K <sub>2</sub> HPO <sub>4</sub> · 3H <sub>2</sub> O) | 0.23    | 99         | 228.22                 |
| 5     | Magnesium chloride hexahydrate (MgCl <sub>2</sub> · 6H <sub>2</sub> O)                           | 0.31    | 98         | 203.30                 |
| 6     | Hydrochloric acid solution (HCl) = 1 mol/L                                                       | 39 (mL) | -          | -                      |
| 7     | Calcium chloride (CaCl <sub>2</sub> )                                                            | 0.29    | 95         | 110.98                 |
| 8     | Sodium sulphate (Na <sub>2</sub> SO <sub>4</sub> )                                               | 0.07    | 99         | 142.04                 |
| 9     | Tris- hydroxymethyl aminomethane ((HOCH <sub>2</sub> ) <sub>3</sub> CNH <sub>2</sub> )           | 6.11    | 99         | 121.13                 |

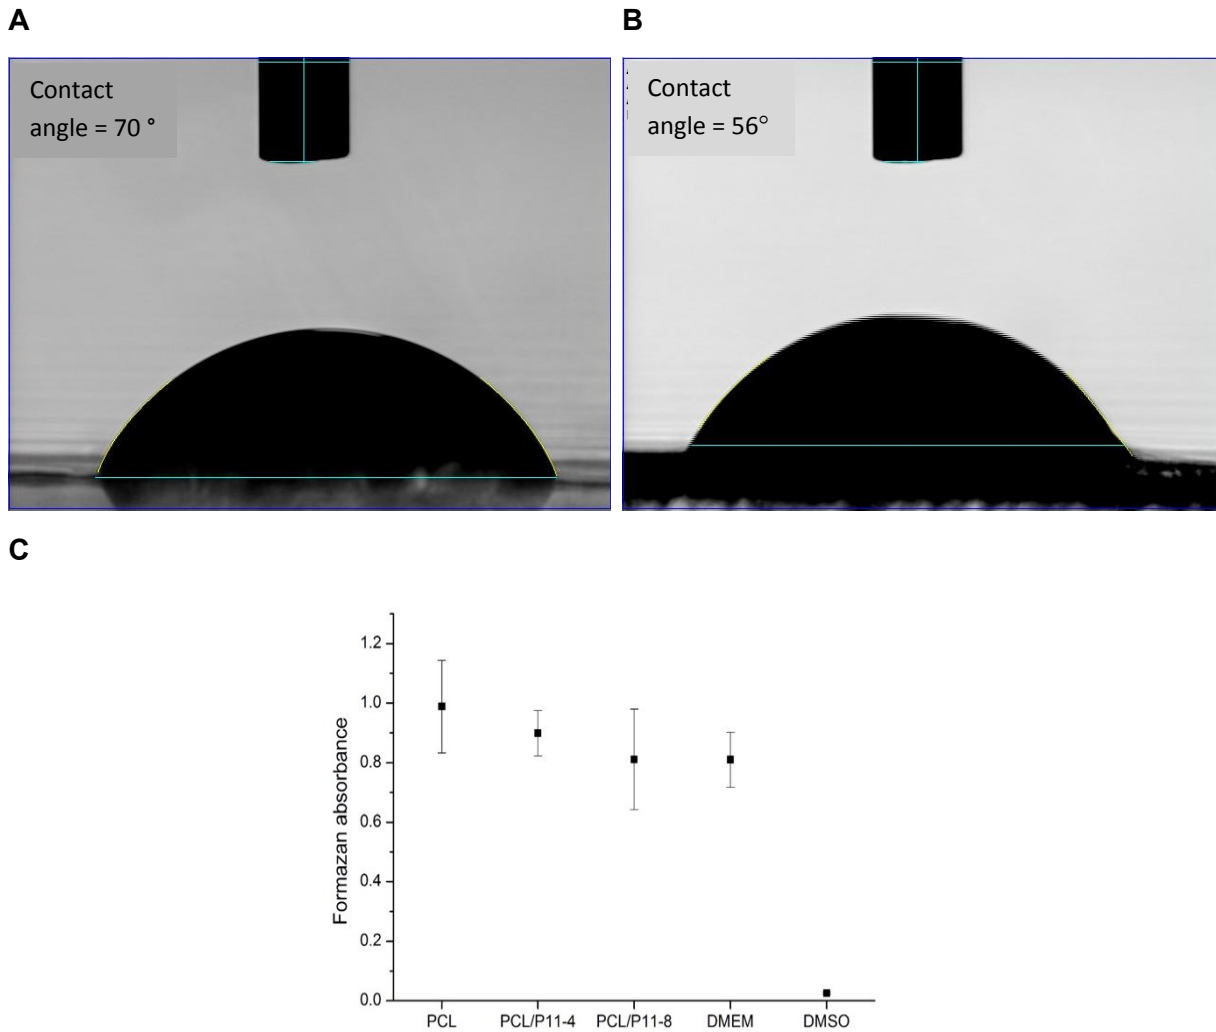

**SI Figure 1. Initial contact angle of deionised water on electrospun scaffolds: (A-B) sample 2 and 3; PCL with 10 and 20 mg mL<sup>-1</sup> P<sub>11-4</sub> respectively, showing increase in hydrophilicity with the addition of peptide. (C) OD absorption of fibrous samples 4 and 5 (PCL with 40 mg mL<sup>-1</sup> of P<sub>11-4</sub> and P<sub>11-8</sub> respectively) and control samples at 570-650 nm correlated to the number of viable cells.**

**SI Table 2. Cell viability percentage of samples 4 and 5 (PCL with 40 mg mL<sup>-1</sup> of P<sub>11-4</sub> and P<sub>11-8</sub> respectively) calculated based on OD absorption data. Blank is the the cell-free DMEM sample.**

| Sample                | Mean OD<br>(6 repetition) | Cell Viability %<br>Based On Control 1 | Cell Viability %<br>Based On Control 2 |
|-----------------------|---------------------------|----------------------------------------|----------------------------------------|
| PCL/P11-4             | 1.21                      | 100.12                                 | 83.67                                  |
| PCL/P11-8             | 1.12                      | 92.08                                  | 76.95                                  |
| Blank                 | 0.05                      | -                                      | -                                      |
| PCL (control 1)       | 1.21                      | -                                      | -                                      |
| Cell only (control 2) | 1.43                      | -                                      | -                                      |
| Negative control      | 0.10                      | -                                      | -                                      |

**A**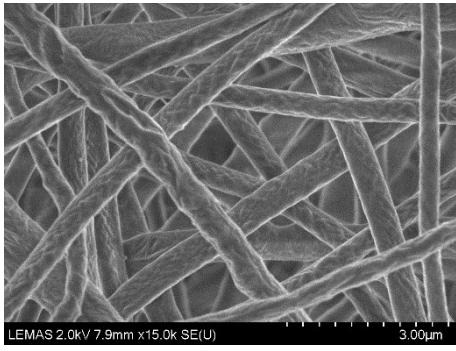**B**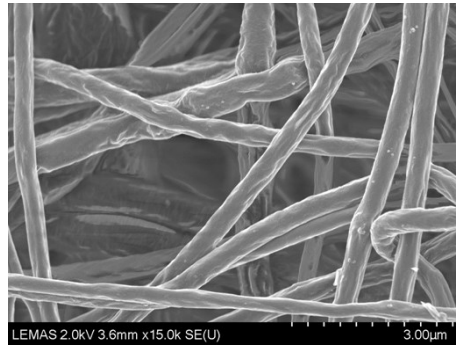**C**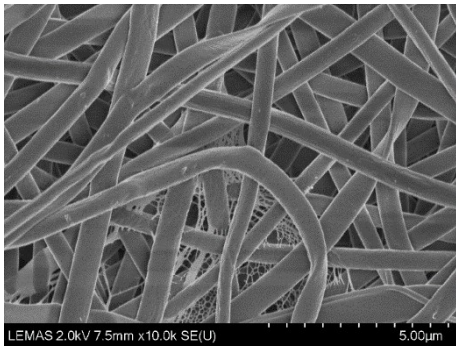**D**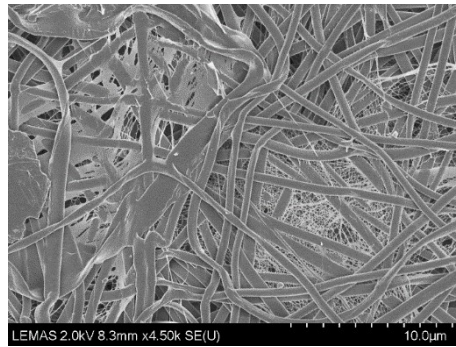**E**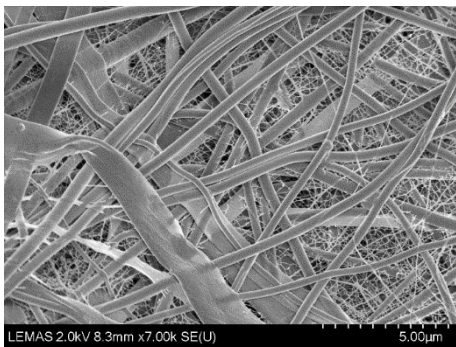**F**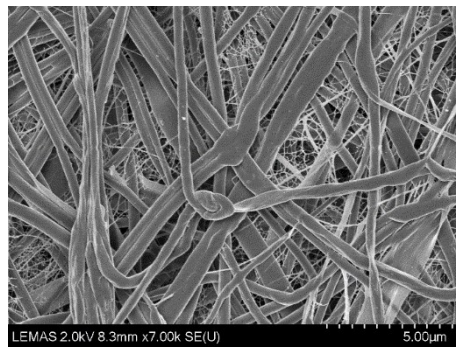

**SI Figure 2. SEM micrographs of electrospun scaffolds after 168 hours incubation of (A-B) PCL at pH 3.5 and 10.5, (C-D) PCL/P<sub>11</sub>-4 (40 mg mL<sup>-1</sup>) at pH 3.5 and 10.5, and (E-F) PCL/P<sub>11</sub>-8 (40 mg mL<sup>-1</sup>) at pH 3.5 and 10.5.**

SI Table 3. An example of elemental analysis of chemical elements in the P<sub>11</sub>-4-supplemented scaffolds (with peptide concentration of 40 mg mL<sup>-1</sup>) after immersion in SBF for 2 weeks obtained by SEM/EDX showing calcium and phosphorous atomic contents.

| Element       | Atomic Content (%) |
|---------------|--------------------|
| C             | 37.07              |
| O             | 40.54              |
| Na            | 1.40               |
| Mg            | 0.44               |
| P             | 6.85               |
| Cl            | 1.61               |
| K             | 0.09               |
| Ca            | 11.80              |
| Cu            | 0.02               |
| Ir            | 0.19               |
| <b>Total:</b> | <b>100.00</b>      |

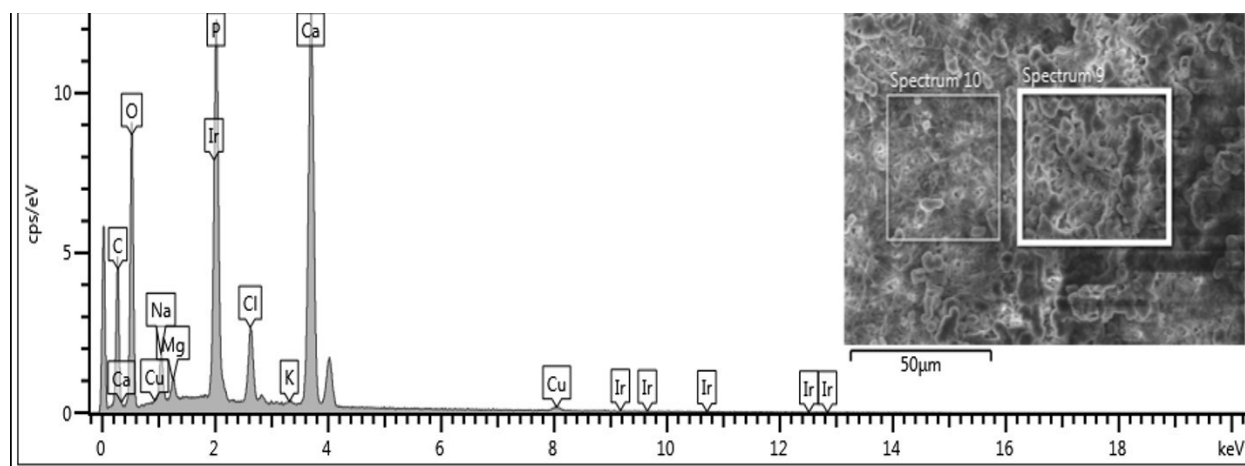

SI Figure 3. EDX spectra of P<sub>11</sub>-4-supplemented scaffold (with peptide concentration of 40 mg mL<sup>-1</sup>) immersed in SBF for 2 weeks showing calcium and phosphorous peaks.

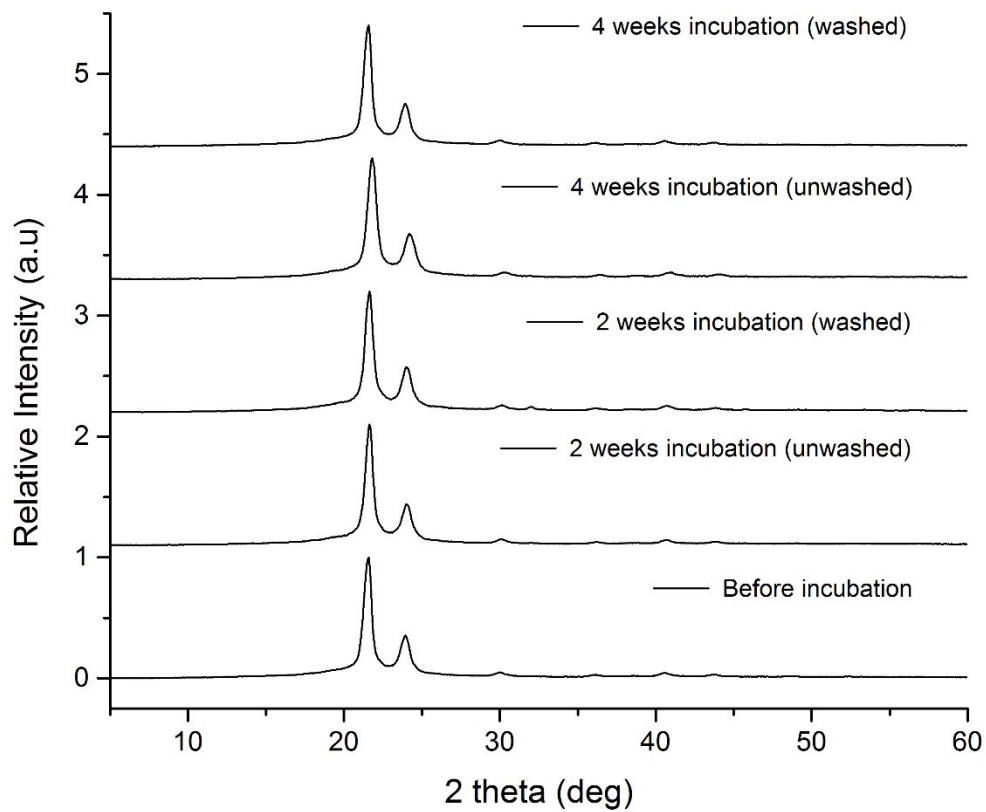

**SI Figure 4. X-ray diffraction patterns of PCL control scaffolds before and after 2 and 4 weeks incubation in SBF (both washed and unwashed samples) showing no hydroxyapatite formation.**
